# Supplementary material
Source: PubMed Central journal article supplement (PMC9749618)
Supplement: NEJMc2214302_disclosures.pdf [file NEJMc2214302_disclosures.pdf]

**Discloser Identifier:** 1089528

**Disclosure Purpose:** 22-14302

## Summary of Interests

I do not have any interests to disclose at this time.

## Additional Questions

**1. Are there other relationships or activities that readers could perceive to have influenced, or that give the appearance of potentially influencing, what you wrote in the submitted work?**

No.

**2. What is the manuscript title?**

Efficacy of Antiviral Agents against Omicron BQ.1.1 and XBB Subvariants

**3. Are you the corresponding author?**

No.

## Certification

I certify that the information provided in this disclosure is complete and accurate.

Peter Halfmann

**Discloser Identifier:** 922310

**Disclosure Purpose:** 22-14302

## Summary of Interests

I do not have any interests to disclose at this time.

## Additional Questions

**1. Are there other relationships or activities that readers could perceive to have influenced, or that give the appearance of potentially influencing, what you wrote in the submitted work?**

No.

**2. What is the manuscript title?**

Efficacy of Antiviral Agents against Omicron BQ.1.1 and XBB Subvariants

**3. Are you the corresponding author?**

No.

## Certification

I certify that the information provided in this disclosure is complete and accurate.

Masaki Imai

**Discloser Identifier:** 922662

**Disclosure Purpose:** 22-14302

## Summary of Interests

I do not have any interests to disclose at this time.

## Additional Questions

**1. Are there other relationships or activities that readers could perceive to have influenced, or that give the appearance of potentially influencing, what you wrote in the submitted work?**

No.

**2. What is the manuscript title?**

Efficacy of Antiviral Agents against Omicron BQ.1.1 and XBB Subvariants

**3. Are you the corresponding author?**

No.

## Certification

I certify that the information provided in this disclosure is complete and accurate.

**Discloser Identifier:** 1058929

**Disclosure Purpose:** 22-14302

## Summary of Interests

I do not have any interests to disclose at this time.

## Additional Questions

**1. Are there other relationships or activities that readers could perceive to have influenced, or that give the appearance of potentially influencing, what you wrote in the submitted work?**

No.

**2. What is the manuscript title?**

Efficacy of Antiviral Agents against Omicron BQ.1.1 and XBB Subvariants

**3. Are you the corresponding author?**

No.

## Certification

I certify that the information provided in this disclosure is complete and accurate.

**Discloser Identifier:** 922660

**Disclosure Purpose:** 22-14302

## Summary of Interests

I do not have any interests to disclose at this time.

## Additional Questions

1. **Are there other relationships or activities that readers could perceive to have influenced, or that give the appearance of potentially influencing, what you wrote in the submitted work?**

No.

2. **What is the manuscript title?**

Efficacy of Antiviral Agents against Omicron BQ.1.1 and XBB Subvariants

3. **Are you the corresponding author?**

No.

## Certification

I certify that the information provided in this disclosure is complete and accurate.

Discloser Identifier: 419009

Disclosure Purpose: 22-14302

## Summary of Interests

## Company or Organization

| Entity                                                                                                                                                                            | Type             | Interest Held By |
|-----------------------------------------------------------------------------------------------------------------------------------------------------------------------------------|------------------|------------------|
| Daiichi Sankyo Company LTD                                                                                                                                                        | Grant / Contract | Self             |
| <i>Recipient Name:</i> Yoshihiro Kawaoka<br><i>Grant / Contract Description:</i> Development of influenza vaccines<br><i>Additional Information:</i>                              |                  |                  |
| <i>Recipient Type:</i> Individual<br><i>Grant / Contract Purpose:</i> Research                                                                                                    |                  |                  |
| Japan Agency for Medical Research and Development                                                                                                                                 | Grant / Contract | Self             |
| <i>Recipient Name:</i> Yoshihiro Kawaoka<br><i>Grant / Contract Description:</i> JP21fk0108615<br><i>Additional Information:</i>                                                  |                  |                  |
| <i>Recipient Type:</i> Individual<br><i>Grant / Contract Purpose:</i> Research                                                                                                    |                  |                  |
| Japan Agency for Medical Research and Development                                                                                                                                 | Grant / Contract | Self             |
| <i>Recipient Name:</i> Yoshihiro Kawaoka<br><i>Grant / Contract Description:</i> JP223fa627001<br><i>Additional Information:</i> Grant to the institution for vaccine development |                  |                  |
| <i>Recipient Type:</i> Institution<br><i>Grant / Contract Purpose:</i> Research                                                                                                   |                  |                  |
| Japan Agency for Medical Research and Development                                                                                                                                 | Grant / Contract | Self             |
| <i>Recipient Name:</i> Yoshihiro Kawaoka<br><i>Grant / Contract Description:</i> JP21wm0125002<br><i>Additional Information:</i>                                                  |                  |                  |
| <i>Recipient Type:</i> Individual<br><i>Grant / Contract Purpose:</i> Research                                                                                                    |                  |                  |
| Japan Agency for Medical Research and Development                                                                                                                                 | Grant / Contract | Self             |
| <i>Recipient Name:</i> Yoshihiro Kawaoka<br><i>Grant / Contract Description:</i> JP20nk0101632<br><i>Additional Information:</i>                                                  |                  |                  |
| <i>Recipient Type:</i> Individual<br><i>Grant / Contract Purpose:</i> Research                                                                                                    |                  |                  |
| Japan Agency for Medical Research and Development                                                                                                                                 | Grant / Contract | Self             |
| <i>Recipient Name:</i> Yoshihiro Kawaoka<br><i>Grant / Contract Description:</i> JP21fk0108552<br><i>Additional Information:</i>                                                  |                  |                  |
| <i>Recipient Type:</i> Individual<br><i>Grant / Contract Purpose:</i> Research                                                                                                    |                  |                  |
| KM Biologics                                                                                                                                                                      | Grant / Contract | Self             |
| <i>Recipient Name:</i> Yoshihiro Kawaoka<br><i>Grant / Contract Description:</i> Development of novel influenza vaccines<br><i>Additional Information:</i>                        |                  |                  |
| <i>Recipient Type:</i> Individual<br><i>Grant / Contract Purpose:</i> Research                                                                                                    |                  |                  |
| Kyoritsu Seiyaku                                                                                                                                                                  | Grant / Contract | Self             |
| <i>Recipient Name:</i> Yoshihiro Kawaoka<br><i>Grant / Contract Description:</i> Development of adjuvants<br><i>Additional Information:</i>                                       |                  |                  |
| <i>Recipient Type:</i> Individual<br><i>Grant / Contract Purpose:</i> Research                                                                                                    |                  |                  |

| Entity                                                                                                                                                                                               | Type             | Interest Held By |
|------------------------------------------------------------------------------------------------------------------------------------------------------------------------------------------------------|------------------|------------------|
| Shionogi                                                                                                                                                                                             | Grant / Contract | Self             |
| <i>Recipient Name:</i> Yoshihiro Kawaoka<br><i>Grant / Contract Description:</i> Evaluation of influenza drugs<br><i>Additional Information:</i>                                                     |                  |                  |
| <i>Recipient Type:</i> Individual<br><i>Grant / Contract Purpose:</i> Research                                                                                                                       |                  |                  |
| Toyama Chemical                                                                                                                                                                                      | Grant / Contract | Self             |
| <i>Recipient Name:</i> Yoshihiro Kawaoka<br><i>Grant / Contract Description:</i> Evaluation of influenza drugs<br><i>Additional Information:</i>                                                     |                  |                  |
| <i>Recipient Type:</i> Individual<br><i>Grant / Contract Purpose:</i> Research                                                                                                                       |                  |                  |
| US NIH                                                                                                                                                                                               | Grant / Contract | Self             |
| <i>Recipient Name:</i> Yoshihiro Kawaoka<br><i>Grant / Contract Description:</i> 75N93021C00014<br><i>Additional Information:</i> The Center for Research on Influenza Pathogenesis and Transmission |                  |                  |
| <i>Recipient Type:</i> Individual<br><i>Grant / Contract Purpose:</i> Research                                                                                                                       |                  |                  |
| US NIH                                                                                                                                                                                               | Grant / Contract | Self             |
| <i>Recipient Name:</i> Yoshihiro Kawaoka<br><i>Grant / Contract Description:</i> HHSN272201400008C<br><i>Additional Information:</i> The Center for Research on Influenza Pathogenesis               |                  |                  |
| <i>Recipient Type:</i> Individual<br><i>Grant / Contract Purpose:</i> Research                                                                                                                       |                  |                  |

## Intellectual Property

| Type                                                                                                                               | Is Licensed | Interest Held By |
|------------------------------------------------------------------------------------------------------------------------------------|-------------|------------------|
| Patent - Influenza reverse genetics                                                                                                | -           | Self             |
| <i>Description:</i> Influenza reverse genetics<br><i>Patent Status:</i> Issued<br><i>Filing Jurisdiction:</i><br><i>Licensees:</i> |             |                  |
| <i>Patent Number:</i> US 20160137987 A1<br><i>Patent Holder:</i>                                                                   |             |                  |
| Licensee                                                                                                                           | Title       | Date             |
| MedImmune, LLC                                                                                                                     |             |                  |
| <i>Additional Information:</i>                                                                                                     |             |                  |

## Additional Questions

1. Are there other relationships or activities that readers could perceive to have influenced, or that give the appearance of potentially influencing, what you wrote in the submitted work?

No.

2. What is the manuscript title?

Efficacy of Antiviral Agents against Omicron BQ.1.1 and XBB Subvariants

3. Are you the corresponding author?

Yes.

- a. Please list the other authors' names here.

Masaki Imai, D.V.M., Ph.D. Mutsumi Ito, D.V.M. Maki Kiso, D.V.M., Ph.D. Seiya Yamayoshi, D.V.M., Ph.D. Ryuta Uraki, Ph.D. Shuetsu Fukushi, Ph.D. Shinji Watanabe, D.V.M., Ph.D. Tadaki Suzuki, M.D., Ph.D. Ken Maeda, D.V.M., Ph.D. Yuko Sakai-

Tagawa, Ph.D. Kiyoko Iwatsuki-Horimoto, D.V.M., Ph.D. Peter J. Halfmann, Ph.D.

## Certification

I certify that the information provided in this disclosure is complete and accurate.

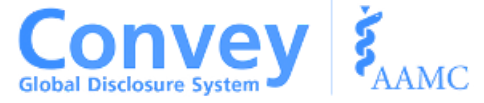



Maki Kiso

**Discloser Identifier:** 419015

**Disclosure Purpose:** 22-14302

## Summary of Interests

I do not have any interests to disclose at this time.

## Additional Questions

**1. Are there other relationships or activities that readers could perceive to have influenced, or that give the appearance of potentially influencing, what you wrote in the submitted work?**

No.

**2. What is the manuscript title?**

Efficacy of Antiviral Agents against Omicron BQ.1.1 and XBB Subvariants

**3. Are you the corresponding author?**

No.

## Certification

I certify that the information provided in this disclosure is complete and accurate.

**Discloser Identifier:** 1087198

**Disclosure Purpose:** 22-14302

## Summary of Interests

I do not have any interests to disclose at this time.

## Additional Questions

**1. Are there other relationships or activities that readers could perceive to have influenced, or that give the appearance of potentially influencing, what you wrote in the submitted work?**

No.

**2. What is the manuscript title?**

Efficacy of Antiviral Agents against Omicron BQ.1.1 and XBB Subvariants

**3. Are you the corresponding author?**

No.

## Certification

I certify that the information provided in this disclosure is complete and accurate.

**Discloser Identifier:** 606450

**Disclosure Purpose:** 22-14302

## Summary of Interests

I do not have any interests to disclose at this time.

## Additional Questions

**1. Are there other relationships or activities that readers could perceive to have influenced, or that give the appearance of potentially influencing, what you wrote in the submitted work?**

No.

**2. What is the manuscript title?**

Efficacy of Antiviral Agents against Omicron BQ.1.1 and XBB Subvariants

**3. Are you the corresponding author?**

No.

## Certification

I certify that the information provided in this disclosure is complete and accurate.

**Discloser Identifier:** 922658

**Disclosure Purpose:** 22-14302

## Summary of Interests

I do not have any interests to disclose at this time.

## Additional Questions

**1. Are there other relationships or activities that readers could perceive to have influenced, or that give the appearance of potentially influencing, what you wrote in the submitted work?**

No.

**2. What is the manuscript title?**

Efficacy of Antiviral Agents against Omicron BQ.1.1 and XBB Subvariants

**3. Are you the corresponding author?**

No.

## Certification

I certify that the information provided in this disclosure is complete and accurate.

**Discloser Identifier:** 1089529

**Disclosure Purpose:** 22-14302

## Summary of Interests

I do not have any interests to disclose at this time.

## Additional Questions

**1. Are there other relationships or activities that readers could perceive to have influenced, or that give the appearance of potentially influencing, what you wrote in the submitted work?**

No.

**2. What is the manuscript title?**

Efficacy of Antiviral Agents against Omicron BQ.1.1 and XBB Subvariants

**3. Are you the corresponding author?**

No.

## Certification

I certify that the information provided in this disclosure is complete and accurate.

**Discloser Identifier:** 1058925

**Disclosure Purpose:** 22-14302

## Summary of Interests

I do not have any interests to disclose at this time.

## Additional Questions

**1. Are there other relationships or activities that readers could perceive to have influenced, or that give the appearance of potentially influencing, what you wrote in the submitted work?**

No.

**2. What is the manuscript title?**

Efficacy of Antiviral Agents against Omicron BQ.1.1 and XBB Subvariants

**3. Are you the corresponding author?**

No.

## Certification

I certify that the information provided in this disclosure is complete and accurate.

**Discloser Identifier:** 897986

**Disclosure Purpose:** 22-14302

## Summary of Interests

I do not have any interests to disclose at this time.

## Additional Questions

**1. Are there other relationships or activities that readers could perceive to have influenced, or that give the appearance of potentially influencing, what you wrote in the submitted work?**

No.

**2. What is the manuscript title?**

Efficacy of Antiviral Agents against Omicron BQ.1.1 and XBB Subvariants

**3. Are you the corresponding author?**

No.

## Certification

I certify that the information provided in this disclosure is complete and accurate.
